# Supplementary material for: Identification of Novel Native Autoantigens in Rheumatoid Arthritis
Source: MDPI journal article supplement (doi:10.3390/biomedicines8060141), 2020-05-29
Supplement: s1 [file s1]

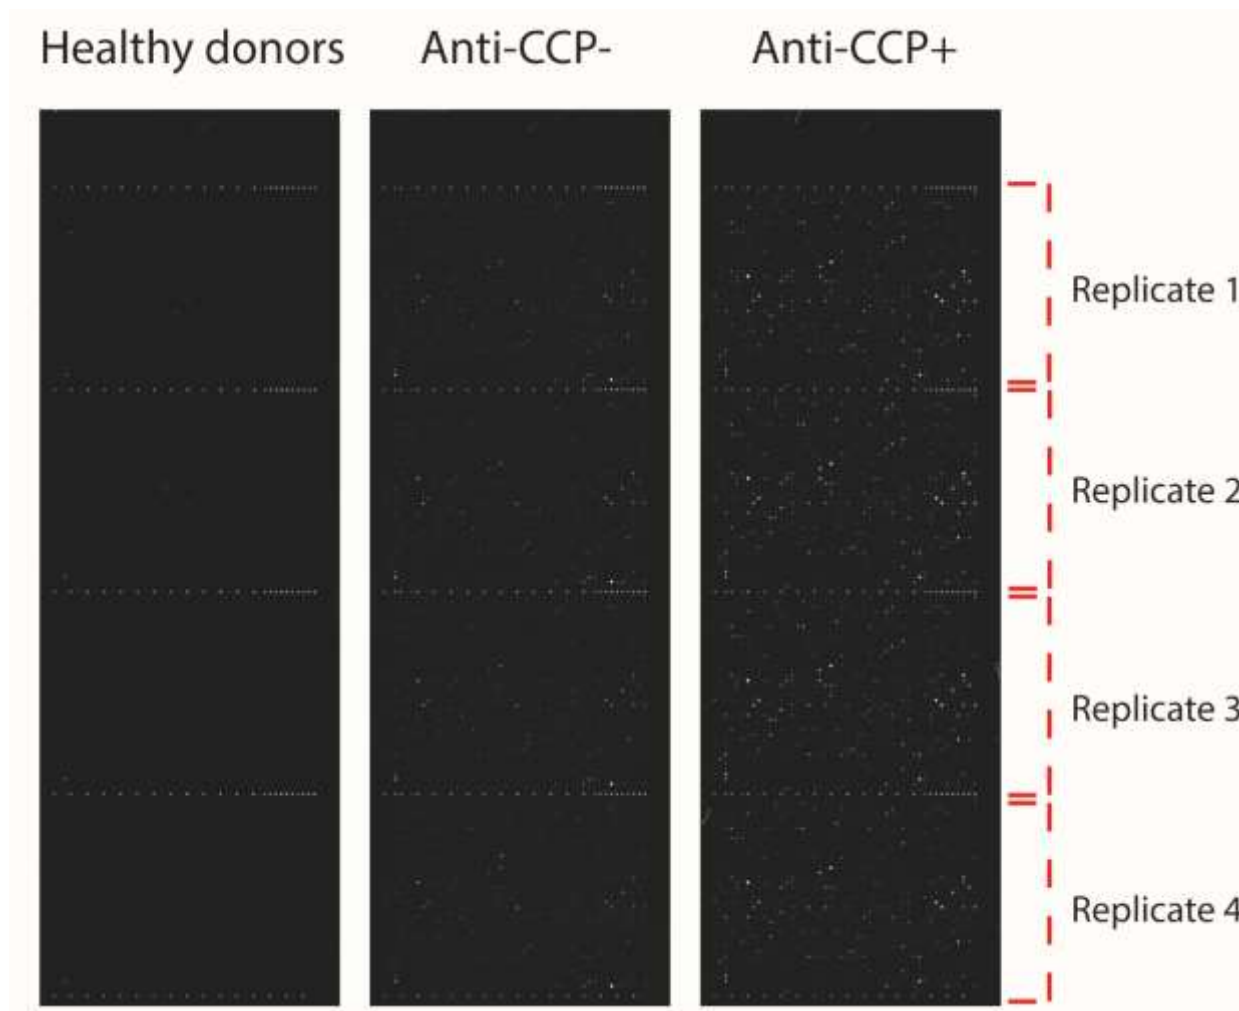

**Figure S1.** Scanned Immunome microarray. The microarrays including the four on-slide replicates containing a total of more than 1600 proteins in quadruplicates.

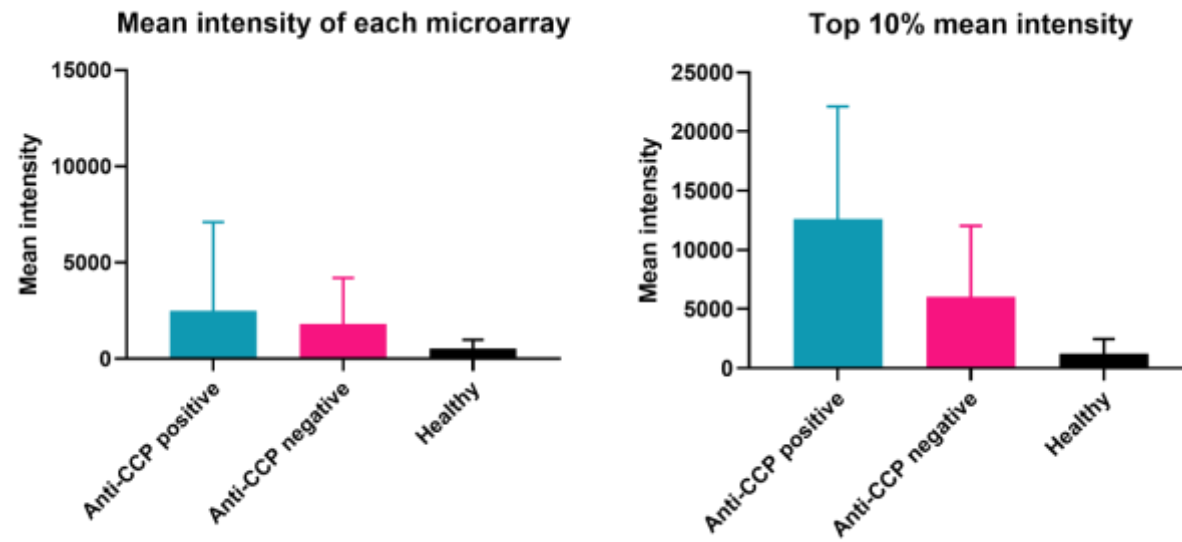

**Figure S2.** General intensity of rheumatoid arthritis and healthy donor plasma. The average intensity of all proteins included on the microarrays after the addition of anti-CCP positive or anti-CCP negative rheumatoid arthritis plasma or healthy donor plasma. It also demonstrates the average intensity of the top 10% most intense targets on each slide, demonstrating the general intensity across each population of patients.

**Table S1.** Native proteins recognized by antibodies in plasma from anti-CCP positive or anti-CCP negative RA patients\*.

| Protein                                                              | Gene     | Anti-CCP positive plasma vs healthy donor plasma (fold-change) | Anti-CCP negative plasma vs healthy donor plasma (fold-change) | Unique identified in one of the two RA groups: Anti-CCP positive vs Anti-CCP negative plasma (fold-change) | Identified in the human autoantigen database (AagAtlas) <sup>a</sup> |
|----------------------------------------------------------------------|----------|----------------------------------------------------------------|----------------------------------------------------------------|------------------------------------------------------------------------------------------------------------|----------------------------------------------------------------------|
| Acetyl-CoA acetyltransferase, cytosolic                              | ACAT2    | 20                                                             |                                                                | 4                                                                                                          |                                                                      |
| Fructose-bisphosphate aldolase A                                     | ALDOA    | 26                                                             | 9                                                              |                                                                                                            |                                                                      |
| BAG family molecular chaperone regulator 3                           | BAG3     |                                                                | 5                                                              | 0.4                                                                                                        |                                                                      |
| Cilia- and flagella-associated protein 410                           | C21orf2  | 14                                                             | 7                                                              |                                                                                                            |                                                                      |
| Glutamine amidotransferase-like class 1 domain-containing protein 3A | C21orf33 | 5                                                              | 3                                                              |                                                                                                            |                                                                      |
| Calcium/calmodulin-dependent protein kinase type II subunit beta     | CAMK2B   | 9                                                              | 4                                                              |                                                                                                            |                                                                      |
| Calcium/calmodulin-dependent protein kinase type II subunit gamma    | CAMK2G   | 13                                                             | 5                                                              |                                                                                                            |                                                                      |
| Calcium-regulated heat-stable protein 1                              | CARHSP1  | 35                                                             |                                                                | 4                                                                                                          |                                                                      |
| Protein CBFA2T3                                                      | CBFA2T3  |                                                                | 3                                                              |                                                                                                            |                                                                      |
| Carcinoembryonic antigen-related cell adhesion molecule 1            | CEACAM1  |                                                                | 3                                                              |                                                                                                            | Yes.                                                                 |
| COMM domain-containing protein 3                                     | COMMD3   | 17                                                             |                                                                | 3                                                                                                          |                                                                      |
| Death domain-containing protein CRADD                                | CRADD    | 11                                                             |                                                                |                                                                                                            |                                                                      |
| Cysteine-rich secretory protein 2                                    | CRISP2   | 15                                                             | 7                                                              |                                                                                                            |                                                                      |
| Alpha-crystallin B chain                                             | CRYAB    | 20                                                             | 7                                                              |                                                                                                            | Yes.                                                                 |

|                                                              |           |    |    |   |      |
|--------------------------------------------------------------|-----------|----|----|---|------|
| Cancer/testis antigen 47A                                    | CT47A1    | 19 | 23 |   |      |
| Cancer/testis antigen 55                                     | CXorf48   | 17 | 6  |   |      |
| Discoidin, CUB and<br>LCCL domain-containing<br>protein 2    | DCBLD2    |    | 3  |   |      |
| Doublesex- and mab-3-<br>related transcription<br>factor B1  | DMRTB1    | 15 |    | 3 |      |
| Protein E6                                                   | E6        | 14 |    | 3 |      |
| Elongation factor 1-delta                                    | EEF1D     | 12 | 5  |   |      |
| Elongation factor 1-<br>gamma                                | EEF1G     | 18 | 6  |   |      |
| Gamma-enolase                                                | ENO2      | 15 |    | 3 | Yes. |
| Estrogen-related receptor<br>gamma                           | ESRRG     | 22 | 8  |   |      |
| Fibroblast growth factor<br>receptor 1 extracellular         | FGFR1_ext | 12 | 7  |   | Yes. |
| Forkhead box protein I1                                      | FOXI1     | 11 | 5  |   |      |
| Forkhead box protein R2                                      | FOXR2     | 15 | 5  |   |      |
| Ferritin heavy<br>polypeptide-like 17                        | FTHL17    |    | 5  | 4 |      |
| Glial fibrillary acidic<br>protein                           | GFAP      | 6  | 3  |   |      |
| Geranylgeranyl<br>pyrophosphate synthase                     | GGPS1     | 20 |    | 3 |      |
| Guanine nucleotide-<br>binding protein G(o)<br>subunit alpha | GNAO1     | 12 |    | 2 |      |
| Glutathione S-transferase<br>theta-1                         | GSTT1     |    | 18 |   |      |
| Hydroxyacylglutathione<br>hydrolase-like protein             | HAGHL     | 12 | 6  |   |      |
| Histone deacetylase 1                                        | HDAC1     | 7  | 3  |   | Yes. |
| Histone deacetylase 3                                        | HDAC3     | 14 | 7  |   | Yes. |
| GTPase HRas                                                  | HRAS      | 12 | 5  |   |      |
| Heat shock factor protein<br>1                               | HSF1      | 16 |    | 3 |      |

|                                                          |           |    |   |   |      |
|----------------------------------------------------------|-----------|----|---|---|------|
| DNA-binding protein inhibitor ID-1                       | ID1       | 14 | 6 |   |      |
| Interferon-induced 35 kDa protein                        | IFI35     | 11 | 6 |   |      |
| Immunoglobulin heavy constant gamma 1                    | IGHG1     | 4  | 3 |   |      |
| Interleukin-1 alpha                                      | IL1A      | 8  |   | 3 | Yes. |
| Interleukin enhancer-binding factor 2                    | ILF2      | 26 | 9 |   |      |
| Inosine-5'-monophosphate dehydrogenase 1                 | IMPDH1    | 14 |   | 3 |      |
| Inositol-tetrakisphosphate 1-kinase                      | ITPK1     | 14 | 7 |   |      |
| Keratin, type I cytoskeletal 15                          | KRT15     | 17 | 6 |   | Yes. |
| Keratin, type I cytoskeletal 19                          | KRT19     | 17 | 7 |   | Yes. |
| Keratin, type II cytoskeletal 8                          | KRT8      | 21 |   | 4 | Yes. |
| L-lactate dehydrogenase B chain                          | LDHB      | 16 |   | 4 |      |
| Endoplasmic reticulum protein SC65                       | LEPREL4   | 16 | 7 |   |      |
| Melanoma-associated antigen 10                           | MAGEA10   | 17 | 6 |   |      |
| Mitogen-activated protein kinase 8                       | MAPK8_tv1 | 14 |   | 3 |      |
| Mitogen-activated protein kinase 9                       | MAPK9     | 13 | 5 |   | Yes. |
| Macrophage migration inhibitory factor                   | MIF       | 24 | 5 |   |      |
| MAP kinase-interacting serine/threonine-protein kinase 1 | MKNK1     | 11 | 4 |   |      |
| Melanoma antigen recognized by T-cells 1                 | MLANA     | 12 | 5 |   | Yes. |

|                                                               |         |    |    |     |      |
|---------------------------------------------------------------|---------|----|----|-----|------|
| MOB kinase activator 3A                                       | MOBKL2A | 21 | 7  |     |      |
| Myelin protein zero-like protein 2                            | MPZL2   | 16 | 7  |     |      |
| Interferon-induced GTP-binding protein Mx1                    | MX1     | 15 |    | 4   |      |
| Nucleosome assembly protein 1-like 3                          | NAP1L3  | 3  | 5  |     |      |
| Nucleoside diphosphate kinase, mitochondrial                  | NME4    | 21 |    | 4   |      |
| Photoreceptor-specific nuclear receptor                       | NR2E3   | 19 | 7  |     | Yes. |
| Nuclear receptor-binding factor 2                             | NRBF2   |    | 5  | 4   |      |
| Cytosolic Fe-S cluster assembly factor NUBP2                  | NUBP2   | 28 | 10 |     |      |
| Ornithine decarboxylase                                       | ODC1    | 26 | 8  |     |      |
| Pterin-4-alpha-carbinolamine dehydratase                      | PCBD    | 19 | 6  |     |      |
| Phosducin-like protein 3                                      | PDCL3   |    | 7  | 0.4 |      |
| 6-phosphofructo-2-kinase/fructose-2,6-bisphosphatase 4        | PFKFB4  | 15 | 6  |     |      |
| Pyruvate kinase PKLR                                          | PKLR    | 11 |    | 3   |      |
| POU domain class 2-associating factor 1                       | POU2AF1 | 12 |    | 2   |      |
| Protein regulator of cytokinesis 1                            | PRC1    | 13 | 5  |     |      |
| cAMP-dependent protein kinase type I-alpha regulatory subunit | PRKAR1A | 24 | 7  |     |      |
| Proteasome activator complex subunit 3                        | PSME3   | 13 |    | 4   | Yes. |
| Tyrosine-protein phosphatase non-receptor type 20             | PTPN20A | 17 | 7  |     |      |
| Pyrroline-5-carboxylate reductase 1                           | PYCR1   |    | 6  | 4   |      |

|                                                                  |         |    |     |     |      |
|------------------------------------------------------------------|---------|----|-----|-----|------|
| Ribokinase                                                       | RBKS    | 18 |     | 4   |      |
| Probable RNA-binding protein 46                                  | RBM46   | 17 | 6   |     |      |
| Recombining binding protein suppressor of hairless               | RBPJ    |    | 3   |     | Yes. |
| 60S acidic ribosomal protein P1                                  | RPLP1   |    | 7   | 3   | Yes. |
| RUN and FYVE domain-containing protein 1                         | RUFY1   | 12 | 5   |     |      |
| Serologically defined colon cancer antigen 8                     | SDCCAG8 | 16 | 13  |     | Yes. |
| Small G protein signaling modulator 3                            | SGSM3   | 21 | 9   |     |      |
| Endophilin-A2                                                    | SH3GL1  | 4  | 3   |     | Yes. |
| Signal transducer and activator of transcription 1-alpha/beta    | STAT1   | 10 | 4   |     |      |
| Single-stranded DNA-binding protein 4                            | SSBP4   | 17 | 6   |     |      |
| Src kinase-associated phosphoprotein 1                           | SKAP1   | 12 | 12  |     |      |
| Sperm protein associated with the nucleus on the X chromosome N2 | SPANXN2 | 22 | 8   |     |      |
| Spermatogenesis-associated protein 25                            | SPATA25 | 19 | 8   |     |      |
| SSB                                                              | SSB     |    | 121 | 0.1 | Yes. |
| TBC1 domain family member 2A                                     | TBC1D2  | 12 | 6   |     |      |
| Testis-expressed protein 101                                     | TEX101  | 16 | 7   |     |      |
| Protein SSX2                                                     | SSX2    | 15 | 7   |     |      |
| Protein TFG                                                      | TFG     | 14 |     | 3   | Yes. |
| Transketolase                                                    | TKT     | 15 |     | 3   | Yes. |
| Tropomyosin alpha-1 chain                                        | TPM1    |    | 8   |     | Yes. |

|                                             |         |    |    |     |      |
|---------------------------------------------|---------|----|----|-----|------|
| Tropomyosin alpha-3 chain                   | TPM3    | 11 |    | 3   |      |
| TSC22 domain family protein 1               | TSC22D1 | 19 | 7  |     |      |
| Testis-specific Y-encoded protein 3         | TSPY3   | 28 | 9  |     |      |
| Vitamin D3 receptor                         | VDR     | 21 | 8  |     |      |
| Vascular endothelial growth factor B        | VEGFB   |    | 10 |     |      |
| Vimentin                                    | VIM     | 13 | 5  |     | Yes. |
| Zinc finger protein 496                     | ZNF496  |    | 10 | 0.2 |      |
| Zinc finger HIT domain-containing protein 3 | ZNHIT3  | 12 |    | 2   |      |

---

Fold changes for all filtered positive hits between all 3 conditions. This table include the fold changes between conditions for all the differences in intensity after the addition of anti-CCP positive or anti-CCP negative rheumatoid arthritis plasma or healthy donor plasma. Proteins identified as human autoantigens in the AagAtlas databse are also highlighted.



**Table S2.** Native proteins targeted differentially by antibodies in anti-CCP positive and anti-CCP negative plasma. \*.

| Protein                                               | Gene      | Mean relative fluorescence units (RFU), anti-CCP positive plasma | Mean RFU, anti-CCP negative | Fold-change | Identified in the human autoantigen database (AagAtlas) <sup>a</sup> |
|-------------------------------------------------------|-----------|------------------------------------------------------------------|-----------------------------|-------------|----------------------------------------------------------------------|
| Acetyl-CoA acetyltransferase, cytosolic               | ACAT2     | 15827                                                            | 4059                        | 4           | Yes.                                                                 |
| BAG family molecular chaperone regulator 3            | BAG3      | 2996                                                             | 6787                        | 0.4         |                                                                      |
| Calcium-regulated heat-stable protein 1               | CARHSP1   | 12402                                                            | 3126                        | 4           |                                                                      |
| COMM domain-containing protein 3                      | COMMD3    | 11418                                                            | 4328                        | 3           |                                                                      |
| Doublesex- and mab-3-related transcription factor B1  | DMRTB1    | 10638                                                            | 3689                        | 3           |                                                                      |
| Protein E6                                            | E6        | 8879                                                             | 3253                        | 3           |                                                                      |
| Gamma-enolase                                         | ENO2      | 9157                                                             | 2836                        | 3           |                                                                      |
| Ferritin heavy polypeptide-like 17                    | FTHL17    | 19853                                                            | 6201                        | 4           |                                                                      |
| Geranylgeranyl pyrophosphate synthase                 | GGPS1     | 14590                                                            | 4236                        | 3           |                                                                      |
| Guanine nucleotide-binding protein G(o) subunit alpha | GNAO1     | 10452                                                            | 4322                        | 2           |                                                                      |
| Heat shock factor protein 1                           | HSF1      | 8532                                                             | 3002                        | 3           | Yes.                                                                 |
| Interferon-induced GTP-binding protein Mx1            | MX1       | 9574                                                             | 2724                        | 4           |                                                                      |
| Interleukin-1 alpha                                   | IL1A      | 9810                                                             | 3825                        | 3           |                                                                      |
| Inosine-5'-monophosphate dehydrogenase 1              | IMPDH1    | 8285                                                             | 2881                        | 3           | Yes.                                                                 |
| Keratin, type II cytoskeletal 8                       | KRT8      | 10368                                                            | 2984                        | 4           |                                                                      |
| L-lactate dehydrogenase B chain                       | LDHB      | 12630                                                            | 3564                        | 4           |                                                                      |
| SSB                                                   | SSB       | 3102                                                             | 57536                       | 0.1         | Yes.                                                                 |
| Mitogen-activated protein kinase 8                    | MAPK8_tv1 | 9813                                                             | 3972                        | 3           |                                                                      |
| Nucleoside diphosphate kinase, mitochondrial          | NME4      | 14721                                                            | 3543                        | 4           | Yes.                                                                 |
| Nuclear receptor-binding factor 2                     | NRBF2     | 20708                                                            | 6088                        | 4           |                                                                      |
| Phosducin-like protein 3                              | PDCL3     | 5688                                                             | 12749                       | 0.4         |                                                                      |
| Pyruvate kinase PKLR                                  | PKLR      | 9696                                                             | 3149                        | 3           |                                                                      |

|                                                    |         |       |      |     |      |
|----------------------------------------------------|---------|-------|------|-----|------|
| POU domain class 2-associating factor 1            | POU2AF1 | 8954  | 3692 | 2   |      |
| Proteasome activator complex subunit 3             | PSME3   | 7824  | 2226 | 4   | Yes. |
| Pyrroline-5-carboxylate reductase 1, mitochondrial | PYCR1   | 24271 | 6591 | 4   |      |
| Ribokinase                                         | RBKS    | 11552 | 3167 | 4   |      |
| 60S acidic ribosomal protein P1                    | RPLP1   | 15070 | 6012 | 3   | Yes. |
| Protein TRK-fused gene protein                     | TFG     | 12939 | 4210 | 3   | Yes. |
| Transketolase                                      | TKT     | 9353  | 3523 | 3   | Yes. |
| Tropomyosin alpha-3 chain                          | TPM3    | 10387 | 3591 | 3   |      |
| Zinc finger protein 496                            | ZNF496  | 1109  | 4676 | 0.2 |      |
| Zinc finger HIT domain-containing protein 3        | ZNHIT3  | 8607  | 3878 | 2   |      |

---

Unique targeted antigens in one of the two rheumatoid arthritis conditions. Proteins only targeted by IgG from either anti-CCP positive rheumatoid arthritis plasma or anti-CCP negative rheumatoid arthritis plasma are shown with fold-change and their average relative fluorescence unit intensity.
